# Supplementary material
Source: MDPI journal article supplement (https://www.mdpi.com/1660-4601/12/3/3381)
Supplement: s1 [file s1]

The Mediating Effect of Body Mass Index on the Relationship between Cigarette Smoking and Atopic Sensitization in Chinese Adults

Table S1. Association between each smoking category, different types of atopic sensitization and BMI in mediation model <sup>1</sup>.

| Atopic Sensitization to Different<br>Types of Allergens | BMI (Mediator) |                |         | Atopic Sensitization (Y ) |                |         |
|---------------------------------------------------------|----------------|----------------|---------|---------------------------|----------------|---------|
|                                                         | Path           | $\beta$ (SE)   | p Value | Path                      | $\beta$ (SE)   | p Value |
| Allergic to food allergens only                         |                |                |         |                           |                |         |
| Non-smokers                                             |                | Reference      |         |                           | Reference      |         |
| Light smokers(X <sub>1</sub> )                          | a <sub>1</sub> | −0.890 (0.287) | 0.002   | c <sub>1</sub>            | −0.130 (0.534) | 0.809   |
| Moderate smokers(X <sub>2</sub> )                       | a <sub>2</sub> | −0.261 (0.261) | 0.319   | c <sub>2</sub>            | −0.444 (0.549) | 0.419   |
| Heavy smokers(X <sub>3</sub> )                          | a <sub>3</sub> | 0.055 (0.543)  | 0.919   | c <sub>3</sub>            | −0.106 (1.043) | 0.919   |
| Former smokers (X <sub>4</sub> )                        | a <sub>4</sub> | −0.309 (0.356) | 0.386   | c <sub>4</sub>            | 0.396 (0.561)  | 0.481   |
| BMI, kg/m <sup>2</sup> (M)                              | b              | -----          | -----   | -----                     | 0.062(0.027)   | 0.025   |

<sup>1</sup> Mediation analysis adjusted for covariates, including sex, age, educational level, family allergic disease history and alcohol consumption. Abbreviations: SE, Standard Error; BMI: Body Mass Index.

**Table S2.** Indirect and direct effect, through potential mediator, of smoking categories on atopic sensitization <sup>1</sup>.

| Atopic Sensitization to<br>Different<br>Types of Allergens | Indirect Effect of Smoking on Atopic Sensitization ( <i>ab</i> Paths) |                     |                  | Direct Effect of Smoking on Atopic Sensitization ( <i>c'</i> Paths) |                     |                 |
|------------------------------------------------------------|-----------------------------------------------------------------------|---------------------|------------------|---------------------------------------------------------------------|---------------------|-----------------|
|                                                            | Path                                                                  | Point Estimate (SE) | BC 95% CI        | Path                                                                | Point Estimate (SE) | BC 95% CI       |
| <b>Allergic to food<br/>allergens only</b>                 |                                                                       |                     |                  |                                                                     |                     |                 |
| Non-smokers                                                |                                                                       | Reference           |                  |                                                                     | Reference           |                 |
| Light smokers ( $X_1$ )                                    | $a_1b$                                                                | −0.055 (0.030)      | −0.139 to −0.006 | $c'_1$                                                              | −0.083 (0.535)      | −1.132 to 0.967 |
| Moderate smokers ( $X_2$ )                                 | $a_2b$                                                                | −0.016 (0.029)      | −0.092 to 0.028  | $c'_2$                                                              | −0.480 (0.551)      | −1.561 to 0.600 |
| Heavy smokers ( $X_3$ )                                    | $a_3b$                                                                | 0.003 (0.038)       | −0.072 to 0.086  | $c'_3$                                                              | −0.118 (1.042)      | −2.161 to 1.924 |
| Former smokers ( $X_4$ )                                   | $a_4b$                                                                | −0.019 (0.028)      | −0.098 to 0.022  | $c'_4$                                                              | 0.396 (0.562)       | −0.705 to 1.496 |

<sup>1</sup> Mediation analysis adjusted for covariates, including sex, age, educational level, family allergic disease history and alcohol consumption. Abbreviations: SE, Standard Error; BMI: Body Mass Index. BC 95% CI, Bias-Corrected 95% Confidence Interval.

**Table S3.** Characteristics of atopic sensitization cases and hospital health controls in Chinese adults.

|                                       | Case *      | Control     | <i>p</i> Value <sup>a</sup> |
|---------------------------------------|-------------|-------------|-----------------------------|
| N                                     | 786         | 2771        |                             |
| Gender % men                          | 27.23       | 25.41       | 0.303                       |
| Age group %                           |             |             | 0.174                       |
| 18–39                                 | 53.69       | 50.27       |                             |
| 40–59                                 | 40.97       | 43.20       |                             |
| ≥60                                   | 5.34        | 6.53        |                             |
| Educational level %                   |             |             | 0.012                       |
| 1st                                   | 27.23       | 26.67       |                             |
| 2nd                                   | 34.61       | 40.02       |                             |
| 3rd                                   | 38.17       | 33.41       |                             |
| Family allergic disease history % yes | 10.05       | 10.29       | 0.848                       |
| Alcohol drinkers % yes                | 12.85       | 13.64       | 0.566                       |
| Smoking categories                    |             |             | 0.023                       |
| Non-smokers                           | 86.26       | 81.70       |                             |
| Light smokers <sup>1</sup>            | 3.94        | 5.52        |                             |
| Moderate Smoker <sup>2</sup>          | 4.83        | 7.61        |                             |
| Heavy smokers <sup>3</sup>            | 1.53        | 1.48        |                             |
| Former smokers                        | 3.44        | 3.68        |                             |
| BMI, kg/m <sup>2</sup> mean (SD)      | 23.20(4.11) | 22.84(3.54) | 0.025                       |

\* Cases were identified as those that tested positive to IgE for at least one of the common allergens;

<sup>a</sup> Chi-square and *t* test were conducted for categorical variables and continuous variables, respectively;

<sup>1</sup> Light smokers: smoking an average of 1–9 cigarettes per day; <sup>2</sup> Moderate smokers: smoking an average of 10–20 cigarettes per day; <sup>3</sup> Heavy smokers: smoking an average of 21 and more cigarettes per day.

Abbreviations: Educational level. 1st, illiterate or primary school; 2nd, junior/senior secondary school; 3rd, college, university. SD, Standard Deviation.
